# Supplementary material
Source: PubMed Central journal article supplement (PMC6059967)

**Supplemental Figure 1.** Receiver operating curves (ROC) for CRP performance to discriminate TB from no TB in A) Screening cohort, CRP test for all (reference standard: TB culture); B) Triage cohort, CRP in positive symptom screen (reference standard: probable TB diagnosis).

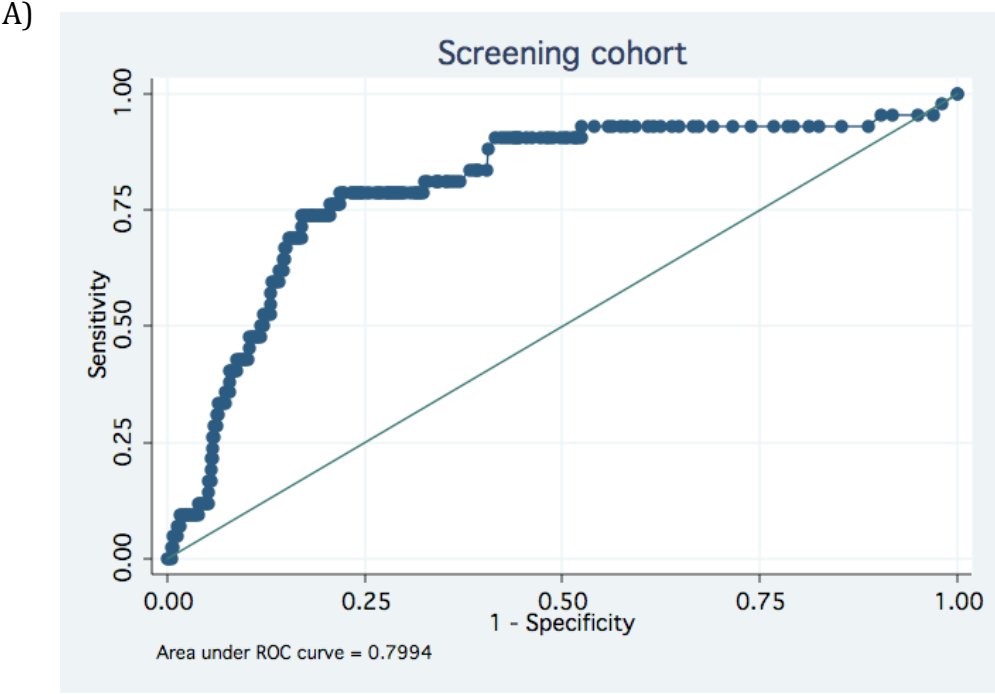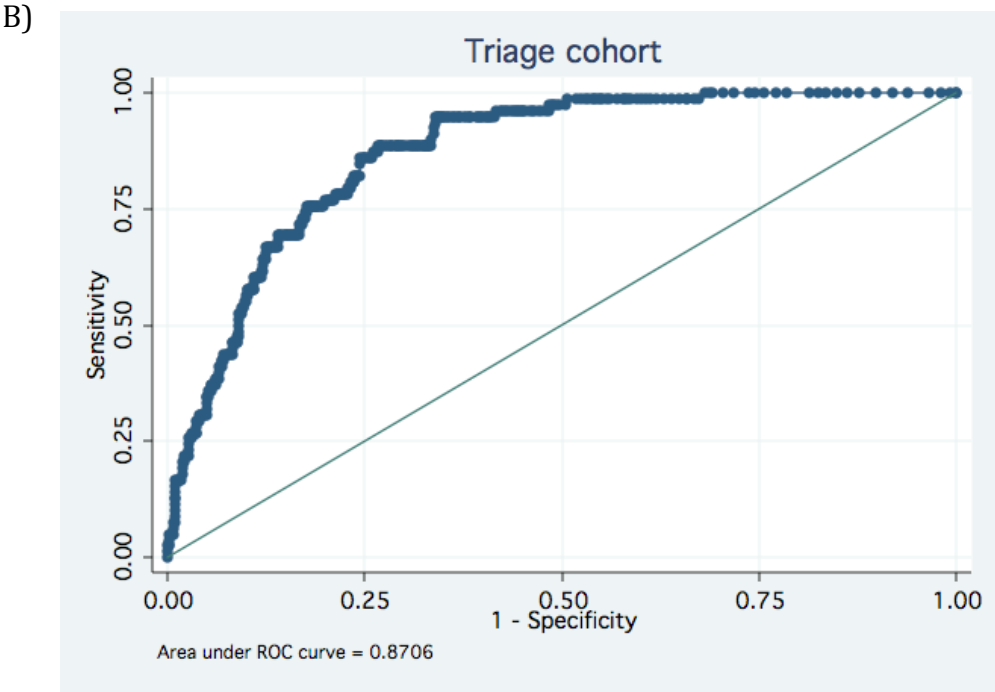

Supplement: NIHMS977004-supplement-Supplemental_Data_File___doc___tif__pdf__etc__.pdf [file NIHMS977004-supplement-Supplemental_Data_File___doc___tif__pdf__etc__.pdf]
